# Supplementary material
Source: Royal Society of Chemistry journal article supplement (doi:10.1039/d5gc06335c)
Supplement: d5gc06335c1.pdf [file d5gc06335c1.pdf]

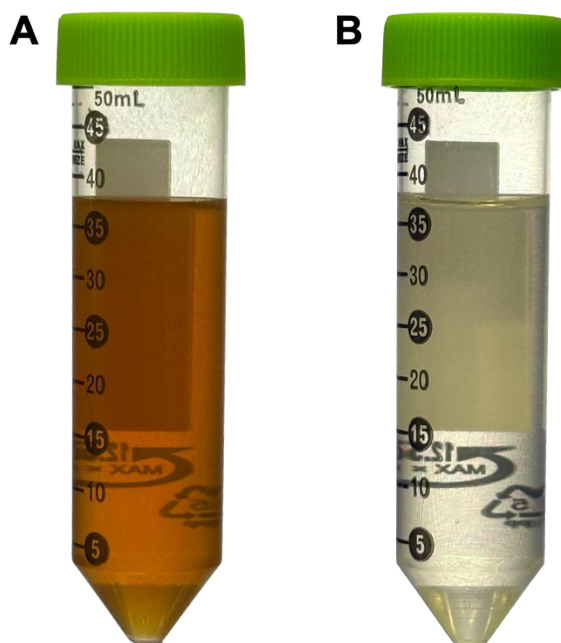

**Fig. S1.** Hydrolysate coloration before (A) and after (B) charcoal filtration. The hydrolysate was generated by butylamine pretreatment followed by enzymatic hydrolysis and conditioning. For detoxification, the hydrolysate was treated with 1/10 (v/v) of 40 - 60 mesh charcoal and sonicated for 10 min. After allowing the charcoal to settle at room temperature, the clarified supernatant was collected and passed through 0.2  $\mu\text{m}$  filters.

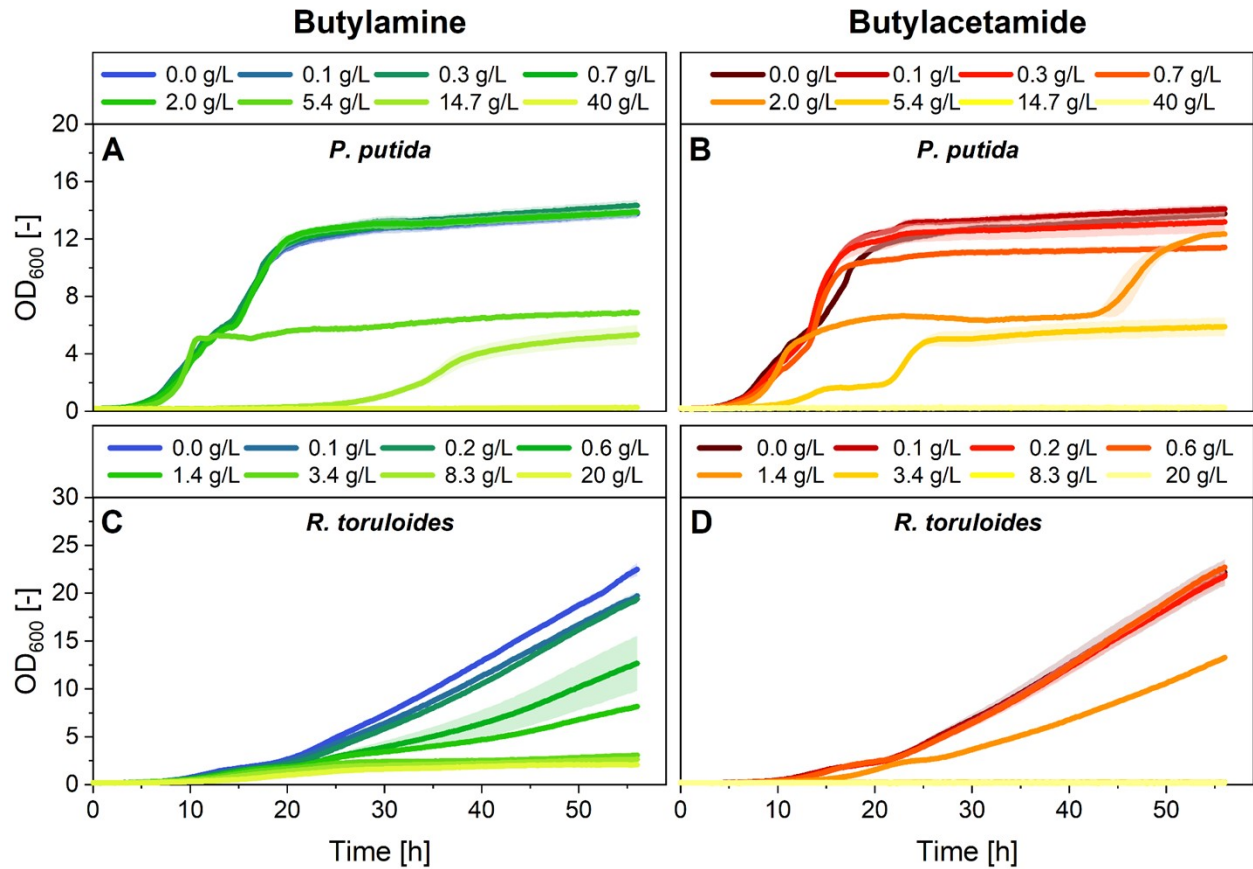

**Fig. S2.** Growth profiles of *P. putida* (A, B) and *R. toruloides* (C, D) from dose–response assays used for IC<sub>50</sub> determination. Cultures were exposed to a log-spaced series of butylamine (blue/green) and butylacetamide (red/yellow) concentrations in chemically defined media. Assays were performed for 56 hours in 48-well FlowerPlates using a microbioreactor system, with each condition tested in triplicate.

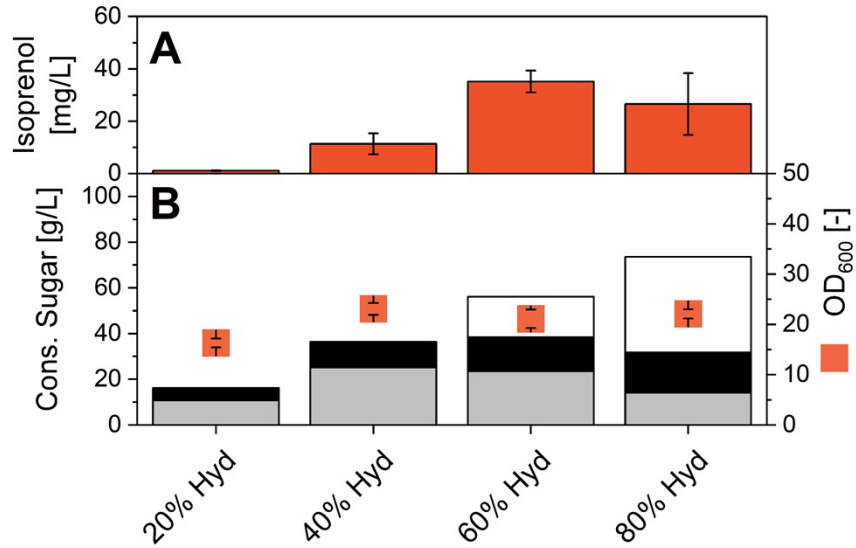

**Fig. S3.** Hydrolysate concentration test for isoprenol production by *Pseudomonas putida*. Cultures were grown in hydrolysate diluted to different concentrations with water and supplemented with a standard nutrient mix (1× M9 salts, 2 mM MgSO<sub>4</sub>, 0.1 mM CaCl<sub>2</sub>, 1× trace metal solution, and 5 g/L (NH<sub>4</sub>)<sub>2</sub>SO<sub>4</sub>). (A) Isoprenol titers; (B) Sugar utilization, with total initial sugar (white bars), glucose consumed (grey), and xylose consumed (black); Final cell density (OD<sub>600</sub>, orange) after 72 h.

**Table S1.** LC-MS analysis of the pretreated hydrolysate. Concentration of sugars, solvent residues, and phenolic compounds in hydrolysate before and after charcoal treatment. Quantified concentrations (g/L) of glucose, xylose, solvent residues (n-butylamine, n-butylacetamide), and identified phenolic compounds in untreated hydrolysate and charcoal-filtered hydrolysate. ND = not detected. The values correspond to the data presented in Figure 2.

| Compound                   | Concentration [g/L] |                                |
|----------------------------|---------------------|--------------------------------|
|                            | Hydrolysate         | Hydrolysate, charcoal-filtered |
| Glucose                    | 67.46436            | 68.2709                        |
| Xylose                     | 29.02059            | 29.15766                       |
| Benzoic acid               | 0.57514             | ND                             |
| 4-Hydroxybenzoic acid      | 0.09801             | ND                             |
| N-butyl-4-hydroxybenzamide | 0.0715              | ND                             |
| 4-Hydroxybenzaldehyde      | 0.00115             | ND                             |
| Ferulic acid               | 0.06423             | ND                             |
| Syringic acid              | 0.02462             | ND                             |
| Vanillic acid              | 0.02935             | ND                             |
| Vanillin                   | 0.00955             | ND                             |
| Protocatechuic acid        | 0.00141             | ND                             |
| Salicylic acid             | 0.00202             | ND                             |
| Catechol                   | 0.00128             | ND                             |
| Syringaldehyde             | 0.00559             | ND                             |
| Butylamine                 | 0.82502             | 0.61438                        |

|                |         |         |
|----------------|---------|---------|
| Butylacetamide | 7.04495 | 0.41692 |
|----------------|---------|---------|

**Table S2.** *A. niger* cell biomass concentrations from the butylamine toxicity assay. Biomass was quantified after 144 h as dry cell weight (DCW). Assays were performed in shake flasks with chemically defined medium (30 °C, 200 rpm), following pre-culture from  $1 \times 10^8$  spores in CM overnight.

| Condition | Butylamine [g/L] | Biomass [g/L] |
|-----------|------------------|---------------|
| Ctrl      | 0                | 10.75 ± 1.07  |
| Lvl. 1    | 0.1              | 10.75 ± 1.07  |
| Lvl. 2    | 0.3              | 9.5 ± 0.71    |
| Lvl. 3    | 0.7              | 10.25 ± 1.07  |
| Lvl. 4    | 2.0              | 9.75 ± 0.35   |
| Lvl. 5    | 5.4              | 1.00 ± 0.71   |
| Lvl. 6    | 14.7             | 0.00 ± 0.00   |
| Lvl. 7    | 40.0             | 0.00 ± 0.00   |

**Table S3.** *A. niger* cell biomass concentrations from the butylacetamide toxicity assay. Biomass was quantified after 144 h as dry cell weight (DCW). Assays were performed in shake flasks with chemically defined medium (30 °C, 200 rpm), following pre-culture from  $1 \times 10^8$  spores in CM overnight.

| Condition | Butylacetamide [g/L] | Biomass [g/L] |
|-----------|----------------------|---------------|
| Ctrl      | 0                    | 9.75 ± 1.77   |
| Lvl. 1    | 0.1                  | 10.50 ± 0.71  |
| Lvl. 2    | 0.3                  | 10.75 ± 2.48  |
| Lvl. 3    | 0.7                  | 8.00 ± 1.41   |
| Lvl. 4    | 2.0                  | 3.50 ± 0.71   |
| Lvl. 5    | 5.4                  | 0.00 ± 0.00   |
| Lvl. 6    | 14.7                 | 0.00 ± 0.00   |
| Lvl. 7    | 40.0                 | 0.00 ± 0.00   |

**Table S4.** Genotypes and features of the microbial strains used in this work.

| Genotype/features                                                                                                                                                        | Name      | Registry ID   |
|--------------------------------------------------------------------------------------------------------------------------------------------------------------------------|-----------|---------------|
| <i>A. niger</i> ATCC 11414/ <i>PgpdA</i> - C4t318- <i>TtrpC</i>                                                                                                          | JJ1       | JBx_275419    |
| <i>P. putida</i> KT2440 $\Delta$ phaABC $\Delta$ mvaB $\Delta$ hbdH $\Delta$ ldhA $\Delta$ PP2675 $\Delta$ gcd::xylABE talBtkA pRK2-PBAD-mvaS-mvaE-Ptrc-MKMM-PMDHKQ-aphA | IY1449SOT | JBx_257853    |
| <i>R. toruloides</i> IFO0880/ <i>PGAPDH</i> -BIS-TNOS, PANT-BIS-TNOS                                                                                                     | GB2       | ABFPUB_000311 |

**Table S5.** Logarithmically spaced concentration ranges of butylamine and butylacetamide used for IC<sub>50</sub> determination with the three organisms. Each organism was exposed to a log-spaced series of concentrations to assess the toxicity of each compound. Concentrations were selected to span sub-inhibitory to fully inhibitory levels, enabling robust curve fitting for each species.

|                      | Conc. [g/L] |        |        |        |        |        |        |       |
|----------------------|-------------|--------|--------|--------|--------|--------|--------|-------|
| Organism             | Ctrl        | Lvl. 1 | Lvl. 2 | Lvl. 3 | Lvl. 4 | Lvl. 5 | Lvl. 6 | Lvl.7 |
| <i>A. niger</i>      | 0           | 0.1    | 0.3    | 0.7    | 2.0    | 5.4    | 14.7   | 40.0  |
| <i>P. putida</i>     | 0           | 0.1    | 0.3    | 0.7    | 2.0    | 5.4    | 14.7   | 40.0  |
| <i>R. toruloides</i> | 0           | 0.1    | 0.2    | 0.6    | 1.4    | 3.4    | 8.3    | 20.0  |
